# Supplementary material for: Gut microbiota–bile acid axis mediated the beneficial associations between dietary lignans and hyperuricemia: a prospective study
Source: Royal Society of Chemistry journal article supplement (doi:10.1039/d4fo00961d), 2024-01-01
Supplement: d4fo00961d1.pdf [file d4fo00961d1.pdf]

## Supplemental Material

### Gut microbiota-bile acid axis mediated the beneficial associations between dietary lignans and hyperuricemia: a prospective study

Lai-Bao Zhuo <sup>1,#</sup>, Yingdi Yang <sup>1,#</sup>, Congmei Xiao <sup>2,3,#</sup>, Fanqin Li <sup>1</sup>, Lishan Lin <sup>1</sup>,  
Yue Xi <sup>1</sup>, Yuanqing Fu <sup>2,3</sup>, Ju-Sheng Zheng <sup>2,\*</sup>, Yu-ming Chen <sup>1,\*</sup>

<sup>1</sup> Department of Epidemiology, Guangdong Provincial Key Laboratory of Food,  
Nutrition and Health, School of Public Health, Sun Yat-sen University, Guangzhou  
510080, China;

<sup>2</sup> Zhejiang Key Laboratory of Multi-Omics in Infection and Immunity, School of  
Medicine and School of Life Sciences, Westlake University, Hangzhou 310030,  
China.

<sup>3</sup> Shenzhen Bao'an Center for Chronic Diseases Control, Shenzhen, China

# L.B. Z., Y. Y., and C. X. contributed equally to the work

#### Corresponding authors:

Yu-ming Chen, PhD, MD

Department of Epidemiology, School of Public Health, Sun Yat-sen University,  
Guangzhou 510080, China. Tel: +8620 87330605. Email: chenyum@mail.sysu.edu.cn.

#### AND

Prof Ju-Sheng Zheng, PhD

Key Laboratory of Growth Regulation and Translational Research of Zhejiang  
Province, School of Life Sciences, Westlake University, 18 Shilongshan Rd, Cloud

Town, Hangzhou, China. Tel: +86 (0)57186915303. Email:

23 zhengjusheng@westlake.edu.cn.

24 **CONTENTS**

25 **Part 1 Supplemental Methods**

26 **Part 2 Figures S1-S10:**

27 Fig. S1 Additional analysis of the relationship between dietary lignans intake and the  
28 incidence of hyperuricemia

29 Fig. S2 Gut microbiota alpha-diversity by dietary lignans intake groups (high vs. low  
30 intake)

31 Fig. S3 Gut microbiota beta-diversity by dietary lignans intake groups (high vs. low  
32 intake)

33 Fig. S4 Differences in fecal metabolome composition

34 Fig. S5 Microbe risk score mediated the association of dietary lignans with uric acid

35 Fig. S6 Gut microbiota mediated the association of dietary matairesinol with uric acid

36 Fig. S7 Gut microbiota mediated the association of dietary pinoresinol with uric acid

37 Fig. S8 Gut microbiota mediated the association of dietary secoisolariciresinol with  
38 uric acid

39 Fig. S9 Fecal bile acid mediated the association of dietary lignans with uric acid

40 Fig. S10 Gut microbiota-fecal bile acid axis mediated the association of dietary  
41 lignans with uric acid

42 **Part 3 Tables S1-S8:**

43 Table S1 Characteristics of study participant

44 Table S2 The association of dietary lignans intake with hyperuricemia incidence

- 45 Table S3 MaAsLin identified gut microbes associated with hyperuricemia
- 46 Table S4 The association of microbe risk score with hyperuricemia
- 47 Table S5 The association of dietary lignans intake with gut microbes
- 48 Table S6 OPLS-DA identified fecal metabolites associated with hyperuricemia
- 49 Table S7 The association of bile acid risk score with hyperuricemia
- 50 Table S8 The association of dietary lignans intake with bile acids
- 51

52

## Part 1 Supplemental Methods

### 53 **Quality control for metagenomic**

54 The microbial DNA extraction and shotgun metagenome sequencing were performed  
55 at Novogene Company (Beijing, China). Post-sequencing, we obtained an average of  
56 41.9 million paired-end raw reads per sample, with a range from 22.1 million to 65.2  
57 million. We utilized PRINSEQ (version 0.20.447) to filter out low-quality reads  
58 according to the following criteria: (1) trimming reads by quality score from the 5' and  
59 3' ends with a quality threshold of 20; (2) removing read pairs if either read was less  
60 than 60 bp, contained 'N' bases, or had an average quality score below 30; and (3)  
61 deduplicating the reads. Additionally, reads that aligned to the human genome (H.  
62 sapiens, UCSC hg19) were excluded using Bowtie2 (version 2.2.5) with the settings –  
63 reorder –no-contain –dovetail. Batch effects were controlled by randomizing sample  
64 processing between batches and using internal standards.

### 65 **Quality control for metabolomic**

66 Quality control samples, consisting of pooled samples, were analyzed every 14 samples  
67 to maintain consistent analytical standards. Raw data generated by ultra-performance  
68 liquid chromatography-tandem mass spectrometry (UPLC-MS/MS) were processed  
69 using QuanMET software (version 2.0, Metabo-Profile, Shanghai, China). This  
70 software facilitated peak integration, calibration, and quantification of each metabolite.  
71 Metabolomic features were annotated with a MSI level 1 confidence by comparing  
72 them to the standards of targeted metabolites, ensuring high accuracy and reliability in  
73 metabolite identification. Principal component analysis was used to assess batch effects

74 and outliers in metabolomic data. Data were normalized using the total peak area to  
75 mitigate the impact of sample concentration variations.

76 **Risk scores construction:**

77 We calculated the MRS and BRS of each individual according to the following  
78 formulas:

$$79 \quad MRS_i = \sum_{j=0}^m Microbe_{ij} direction_j$$

$$80 \quad BRS_i = \sum_{j=0}^n Fmet_{ij} direction_j$$

81 The individual is represented by  $i$ . The letters  $m$  and  $n$  represent the total numbers of  
82 gut microbes and fecal bile acids, respectively.  $Microbe_{ij}$  represents the relative  
83 abundance of the  $j$ th gut microbiota for the  $i$ th individual.  $Fmet_{ij}$  represents the  
84 concentration of the  $j$ th fecal bile acid for the  $i$ th individual.  $direction_j$  represents the  
85 direction of association between the  $j$ th biomarker and hyperuricemia.

86

## Part 2 Figures S1-S10

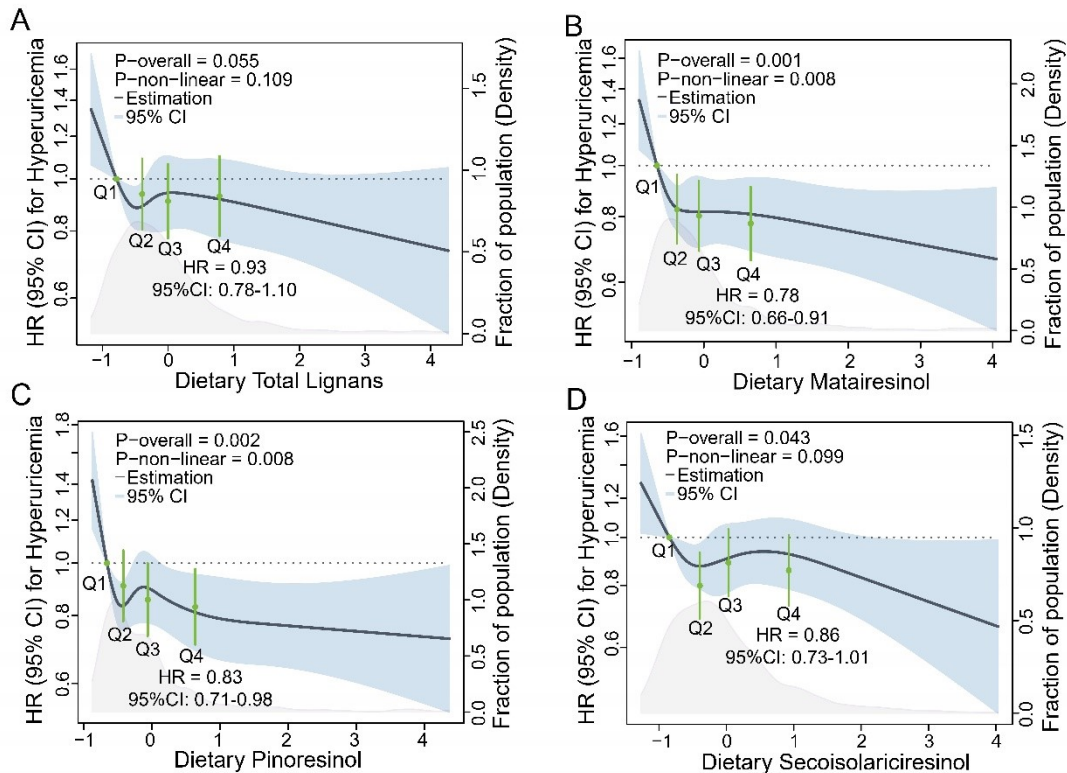

88

89 **Fig. S1 Additional analysis of the relationship between dietary lignans intake and**  
 90 **the incidence of hyperuricemia** A-D, Hazard ratios (HRs) and 95% confidence  
 91 intervals (CIs) for hyperuricemia by the dietary total lignans (A), matairesinol (B),  
 92 pinoresinol (C), and secoisolariciresinol (D), respectively, based on Cox proportional  
 93 hazards regression. Covariate adjustments: age, sex, BMI, education level, household  
 94 average income, marital status, smoking status, drinking status, tea intake, physical  
 95 activity, dietary energy intake, fruit intake, vegetable intake, fish intake, red meat  
 96 intake, hypertension, type 2 diabetes, chronic kidney disease, and the use of  
 97 antihypertensive and antidiabetic drugs. Blue lines and shaded blue areas represent HRs  
 98 and 95% CIs. Gray shaded areas show dietary lignans intake density. Forest plots

99 indicate HRs and 95% CIs for the quartiles (Q) of dietary lignans intake using adjusted

100 Cox proportional hazards regression. HRs: Hazard ratios; CIs: confidence intervals.

101

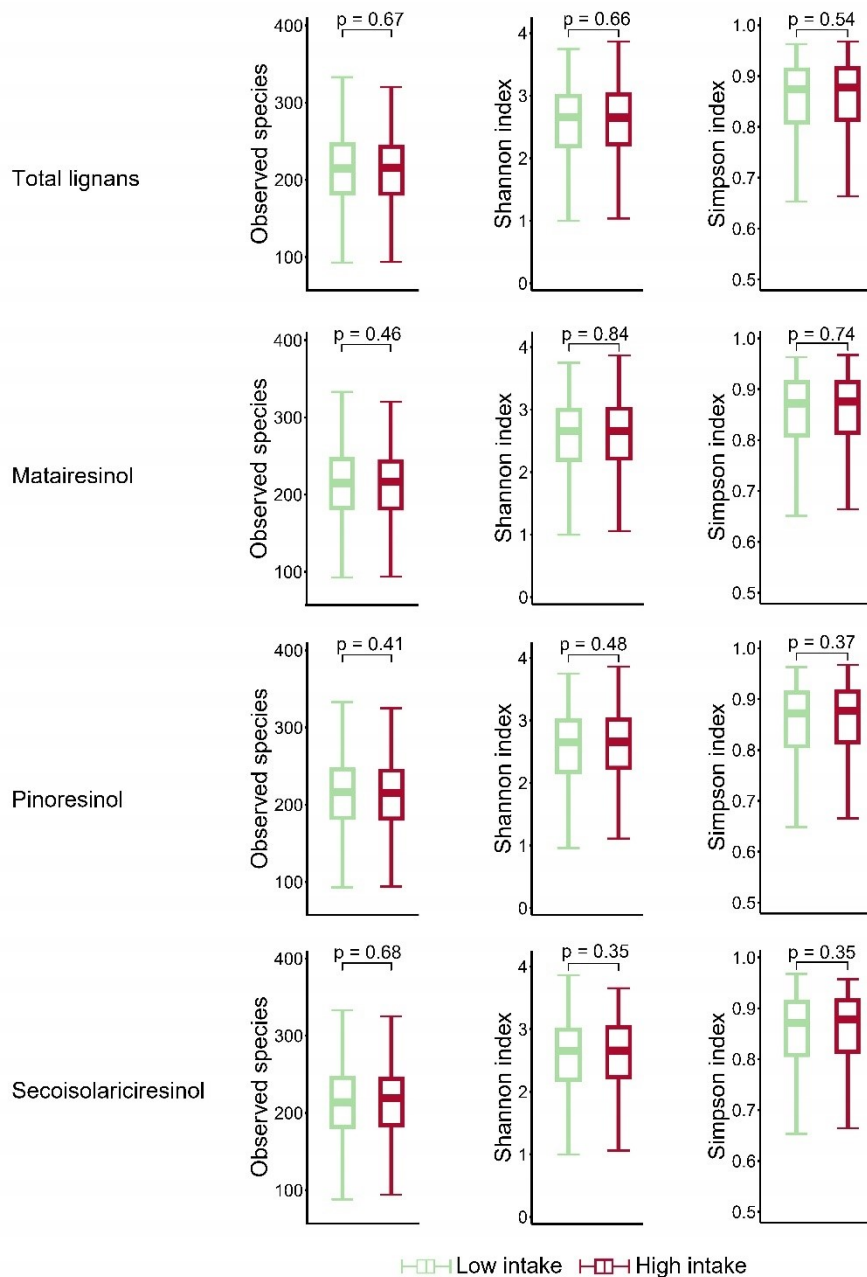

102

103 **Fig. S2 Gut microbiota alpha-diversity by dietary lignans intake groups (high vs.**

104 **low intake)** Boxplots of alpha diversity (Richness, Shannon, and Simpon index)

105 comparisons between high intake group and low intake group. The Wilcoxon rank-sum

106 test was conducted to compare differences in alpha diversity indices between two

107 groups. Participants were divided into two groups based on the upper tertile of dietary

108 lignan intake, distinguishing between high and low intake groups.



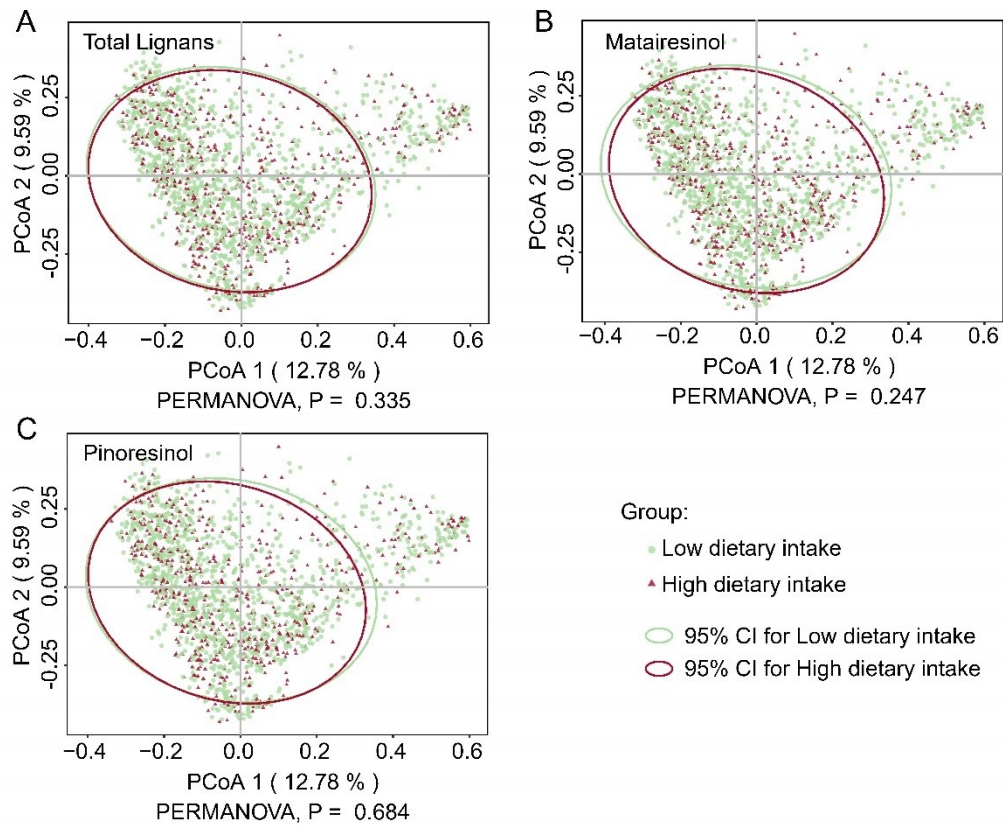

109

110 **Fig. S3 Gut microbiota beta-diversity by dietary lignans intake groups (high vs.**

111 **low intake) A-C,  $\beta$ -diversity by the dietary total lignans groups (A), matairesinol**

112 **groups (B), pinoresinol groups (C).  $\beta$ -diversity was evaluated using a principal**

113 **coordinate analysis plot based on Bray-Cutis distance at the species level.**

114 **Permutational ANOVA (999 permutations) was used to identify the variation in  $\beta$ -**

115 **diversity in the human gut microbiota structure by dietary lignans intake groups (high**

116 **vs. low intake).**

117

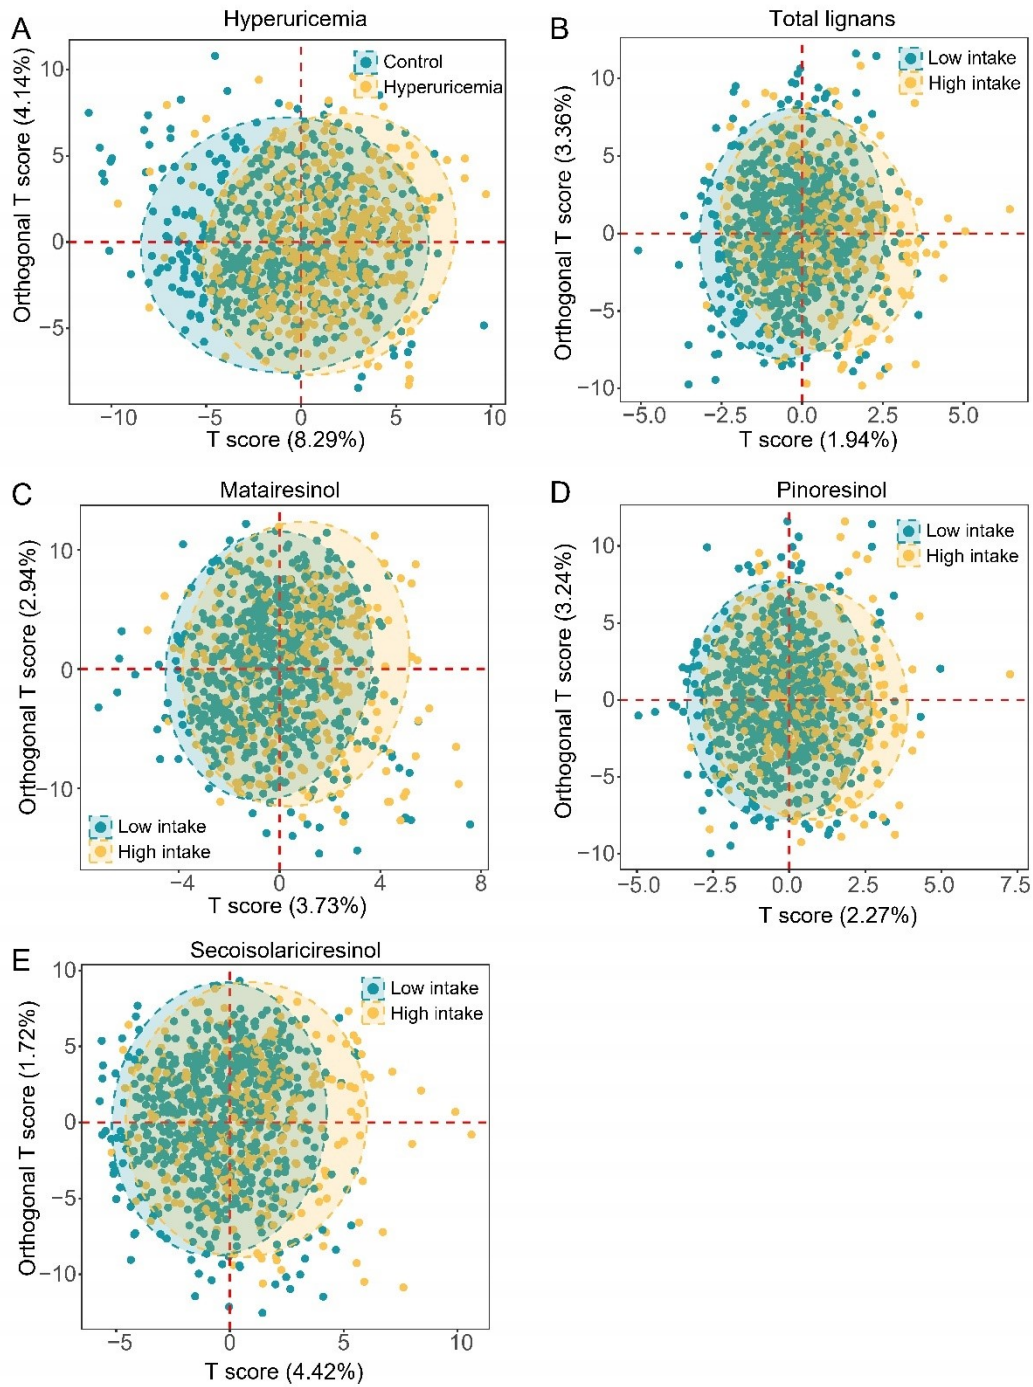

118

119 **Fig. S4 Differences in fecal metabolome composition A-E**, Differences in fecal  
 120 metabolome composition by hyperuricemia groups (hyperuricemia vs. control, **A**),  
 121 dietary total lignans groups (high vs. low intake, **B**), matairesinol groups (**C**),  
 122 pinoresinol groups (**D**), and secoisolariciresinol groups (**E**).

123

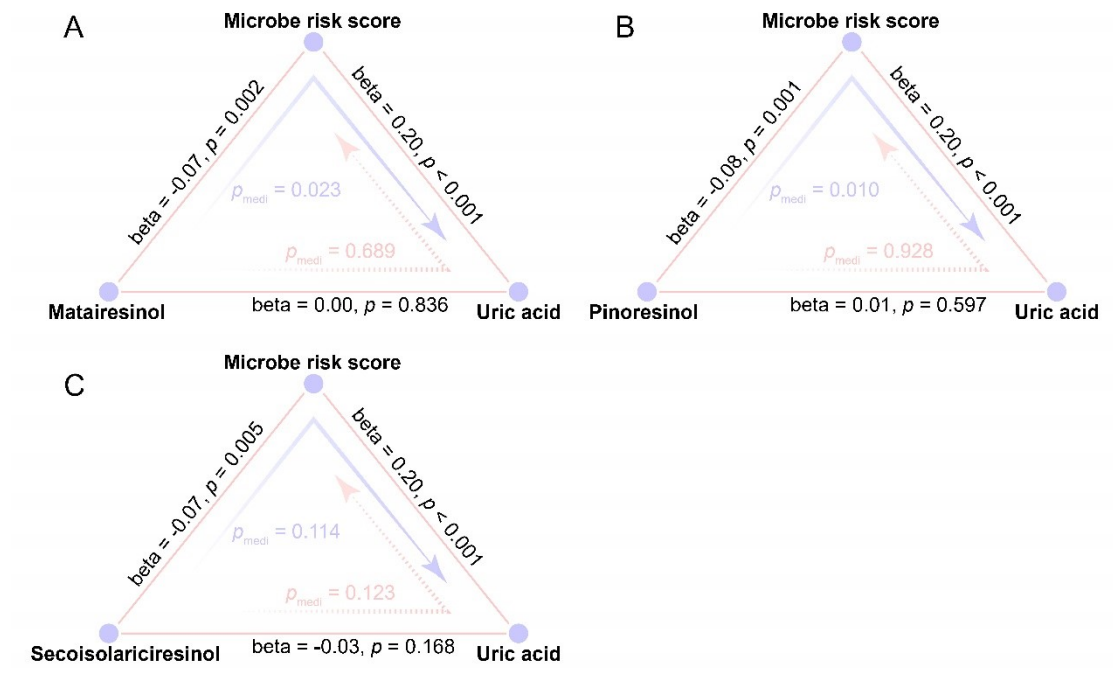

124

125 **Fig. S5 Microbe risk score mediated the association of dietary lignans with uric**

126 **acid.** Diagrams display standardized regression weights.

127

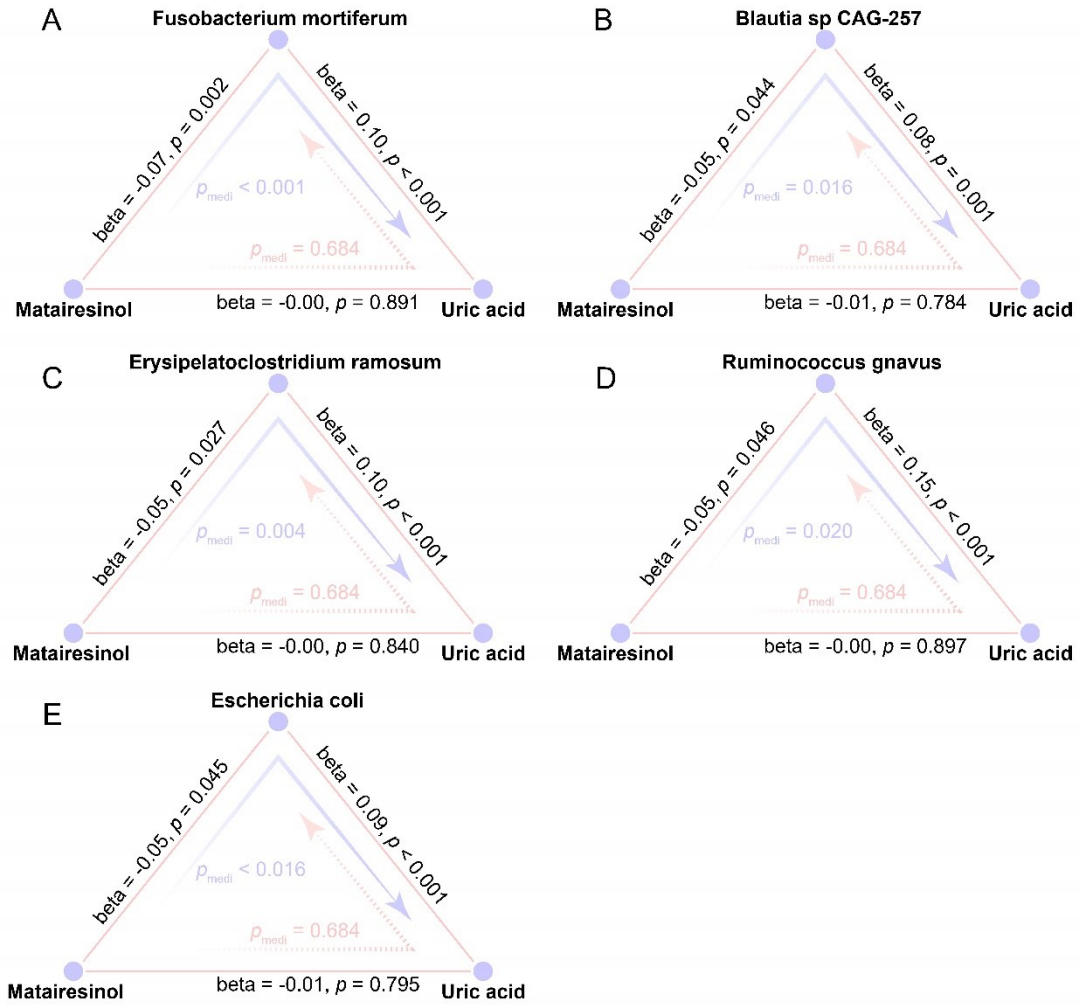

128

129 **Fig. S6 Gut microbiota mediated the association of dietary matairesinol with uric**  
 130 **acid.** Diagrams display standardized regression weights.

131

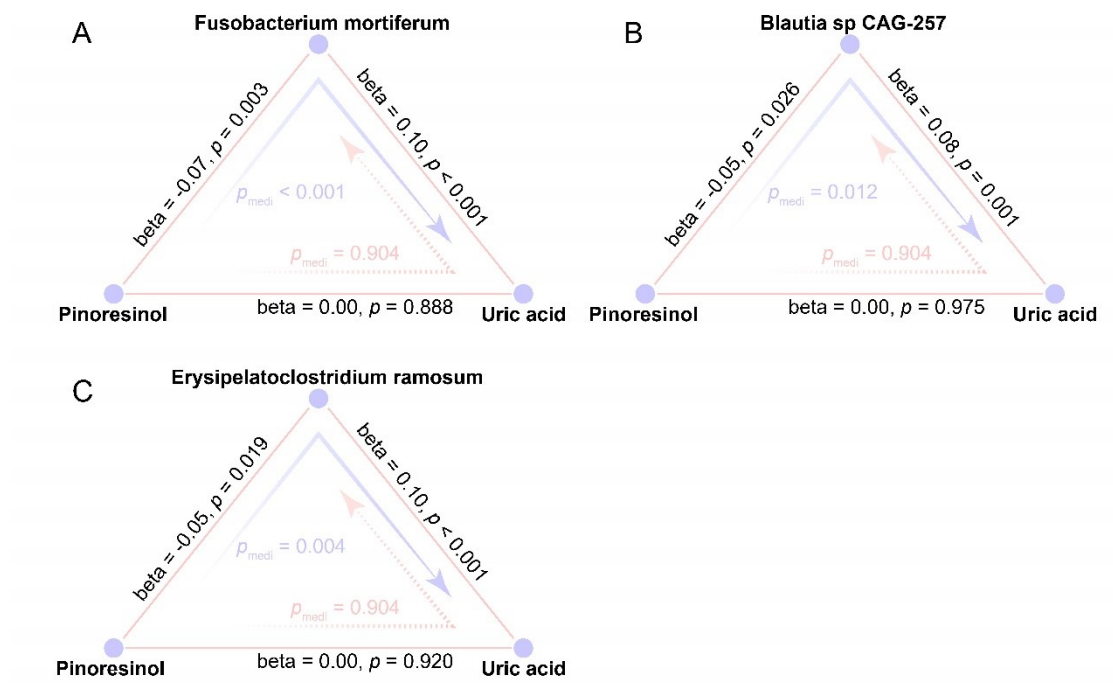

132

133 **Fig. S7 Gut microbiota mediated the association of dietary pinoreosinol with uric**

134 **acid.** Diagrams display standardized regression weights.

135

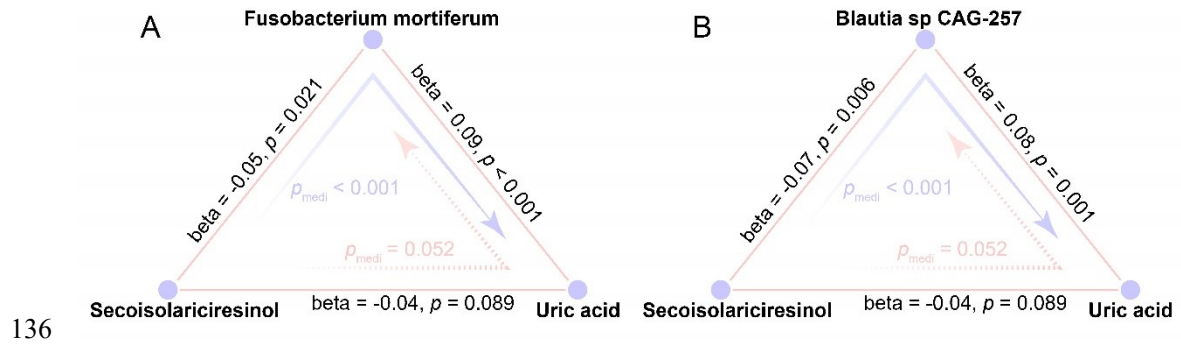

136  
 137 **Fig. S8 Gut microbiota mediated the association of dietary secoisolariciresinol**  
 138 **with uric acid.** Diagrams display standardized regression weights.

139

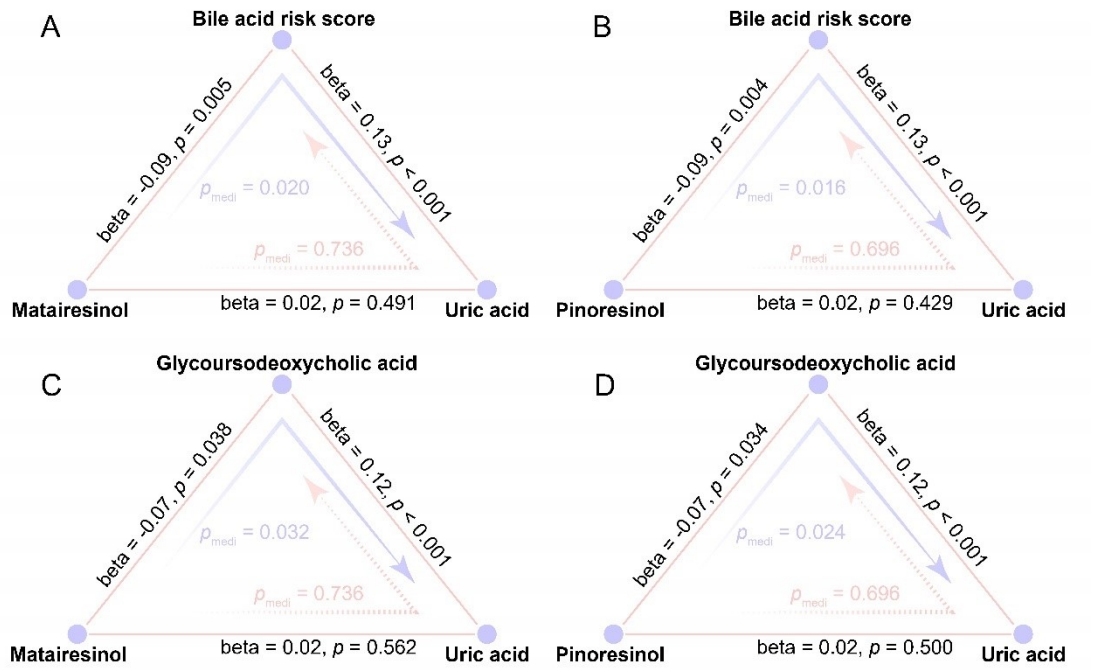

140

141 **Fig. S9 Fecal bile acid mediated the association of dietary lignans with uric acid.**

142 Diagrams display standardized regression weights.

143



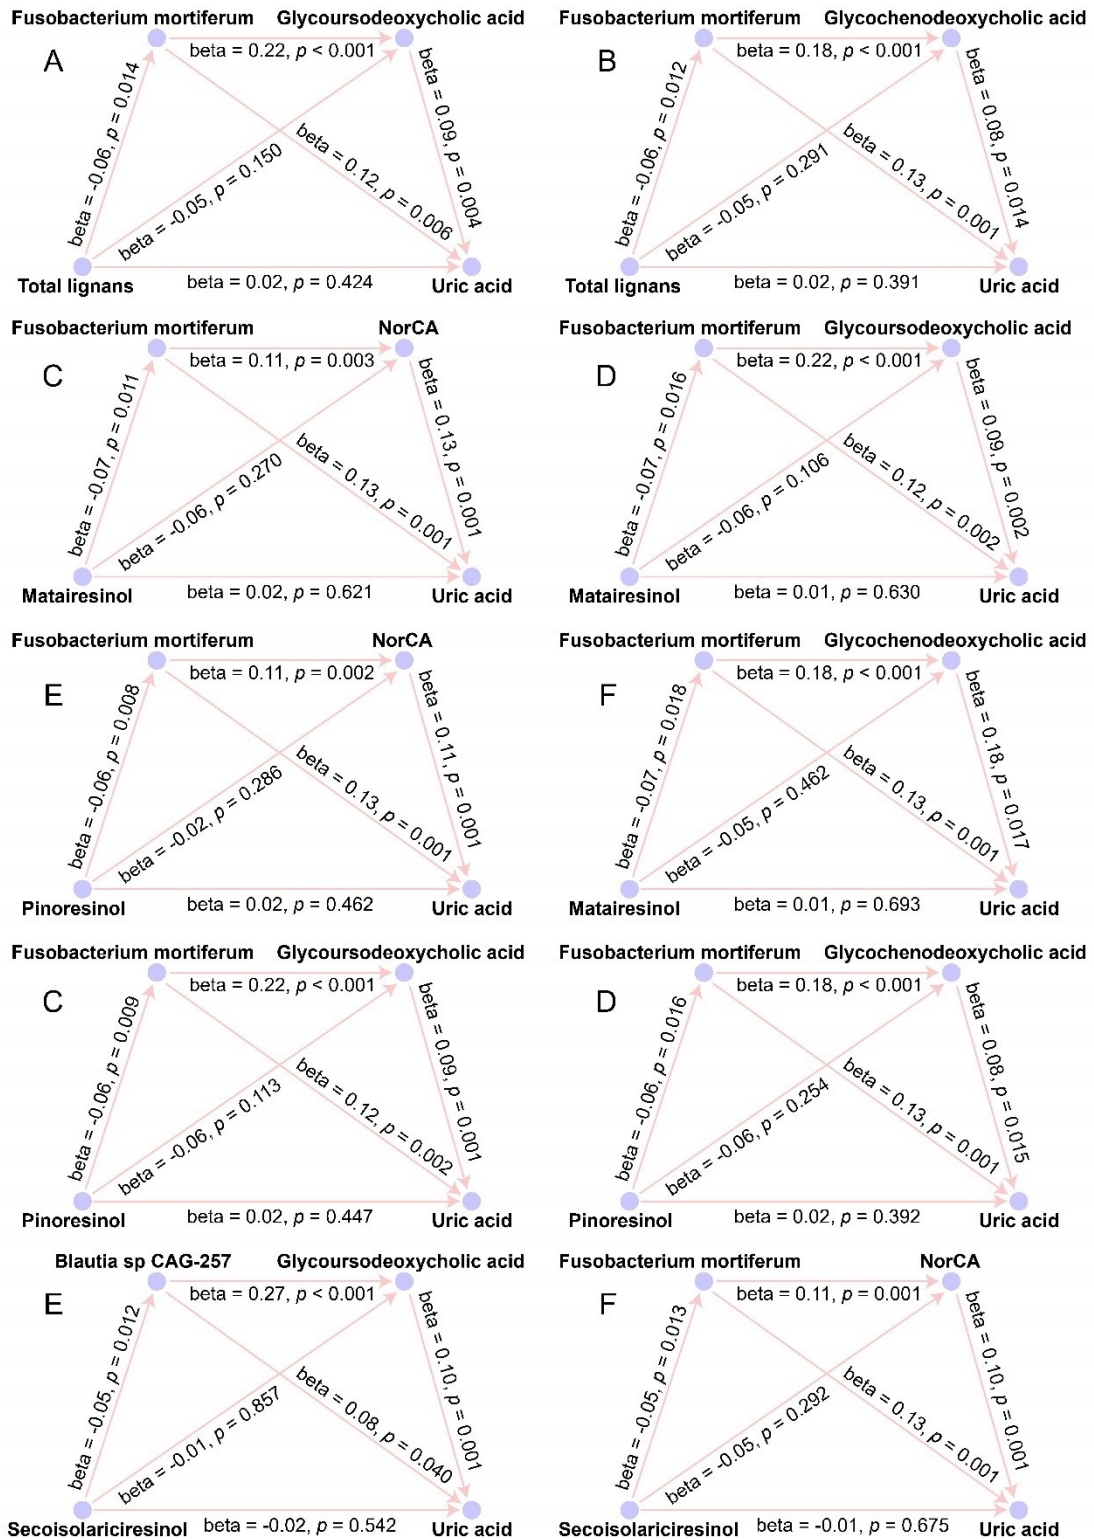

144

145 **Fig. S10** Gut microbiota-fecal bile acid axis mediated the association of dietary  
 146 lignans with uric acid. Diagrams display standardized regression weights.

147



## Part 3 Tables S1-S8

Table S1 Characteristics of study participants

|                                            | Low intake<br>N = 2509 | High intake<br>N = 1292 | <i>p</i> value |
|--------------------------------------------|------------------------|-------------------------|----------------|
| Matairesinol ( $\mu\text{g/d}$ ) *         | 3.60 (2.54, 4.82)      | 8.20 (6.19, 11.1)       | <0.001         |
| Pinoresinol ( $\mu\text{g/d}$ ) *          | 154 (103, 222)         | 412 (312, 577)          | <0.001         |
| Secoisolariciresinol ( $\mu\text{g/d}$ ) * | 49.3 (37.0, 63.6)      | 92.2 (74.6, 120)        | <0.001         |
| Total lignans ( $\mu\text{g/d}$ ) *        | 414 (314, 513)         | 826 (709, 1063)         | <0.001         |
| Uric acid ( $\mu\text{mol/L}$ )            | 307 (102)              | 291 (95.0)              | <0.001         |
| Sex                                        |                        |                         | 0.121          |
| Female                                     | 1690 (67.4%)           | 903 (69.9%)             |                |
| Male                                       | 819 (32.6%)            | 389 (30.1%)             |                |
| Age (years)                                | 58.7 (6.33)            | 58.3 (6.10)             | 0.051          |
| Marital status                             |                        |                         | 0.677          |
| Having a partner                           | 2261 (90.1%)           | 1158 (89.6%)            |                |
| Living alone                               | 248 (9.88%)            | 134 (10.4%)             |                |
| Education                                  |                        |                         | <0.001         |
| Low                                        | 826 (32.9%)            | 345 (26.7%)             |                |
| Medium                                     | 1103 (44.0%)           | 599 (46.4%)             |                |
| High                                       | 580 (23.1%)            | 348 (26.9%)             |                |
| Income                                     |                        |                         | 0.068          |
| Low                                        | 1255 (50.0%)           | 604 (46.7%)             |                |
| Medium                                     | 622 (24.8%)            | 320 (24.8%)             |                |
| High                                       | 632 (25.2%)            | 368 (28.5%)             |                |
| Smoking                                    |                        |                         | 0.781          |
| No                                         | 2096 (83.5%)           | 1074 (83.1%)            |                |
| Yes                                        | 413 (16.5%)            | 218 (16.9%)             |                |
| Drinking                                   |                        |                         | 0.499          |
| No                                         | 2337 (93.1%)           | 1195 (92.5%)            |                |
| Yes                                        | 172 (6.86%)            | 97 (7.51%)              |                |
| Tea intake                                 |                        |                         | 0.646          |
| No                                         | 1177 (46.9%)           | 617 (47.8%)             |                |
| Yes                                        | 1332 (53.1%)           | 675 (52.2%)             |                |
| BMI ( $\text{kg/m}^2$ )                    | 23.3 (3.12)            | 23.5 (3.19)             | 0.124          |
| Physical activity (MET-h/d)                | 40.5 (14.5)            | 41.8 (14.9)             | 0.008          |
| Total energy intake (kcal/d)               | 1606 (455)             | 2139 (699)              | <0.001         |
| Red meat intake (g/d) *                    | 65.0 (43.1, 104)       | 81.2 (53.4, 122)        | <0.001         |
| Fish intake (g/d) *                        | 37.0 (21.1, 60.2)      | 50.9 (30.0, 83.6)       | <0.001         |
| Vegetable intake (g/d) *                   | 292 (218, 378)         | 489 (374, 606)          | <0.001         |
| Fruit intake (g/d) *                       | 105 (58.7, 167)        | 165 (102, 246)          | <0.001         |

150 Participants were divided into two groups based on the upper tertile of dietary lignan  
151 intake, distinguishing between high and low intake groups. Continuous variables with  
152 normal distribution were presented as means (standard deviations), and statistical

153 differences between groups were assessed using t-tests. Conversely, continuous  
154 variables with non-normal distribution (marked with \*) were expressed as medians  
155 (interquartile ranges), with statistical differences between groups evaluated using  
156 Wilcoxon rank-sum test. Differences in population characteristics between two groups  
157 were examined by chi-square test for categorical variables. BMI: body mass index.  
158

159 Table S2 the association of dietary lignans intake with hyperuricemia incidence

| Dietary lignans      | HRs  | Lower CI | Upper CI |
|----------------------|------|----------|----------|
| Total lignans        |      |          |          |
| Q1                   | 1    |          |          |
| Q2                   | 0.94 | 0.80     | 1.09     |
| Q3                   | 0.91 | 0.77     | 1.07     |
| Q4                   | 0.93 | 0.78     | 1.10     |
| Matairesinol         |      |          |          |
| Q1                   | 1    |          |          |
| Q2                   | 0.82 | 0.71     | 0.96     |
| Q3                   | 0.80 | 0.69     | 0.93     |
| Q4                   | 0.77 | 0.66     | 0.90     |
| Pinoresinol          |      |          |          |
| Q1                   | 1    |          |          |
| Q2                   | 0.91 | 0.78     | 1.06     |
| Q3                   | 0.85 | 0.73     | 1.00     |
| Q4                   | 0.83 | 0.70     | 0.97     |
| Secoisolariciresinol |      |          |          |
| Q1                   | 1    |          |          |
| Q2                   | 0.80 | 0.69     | 0.94     |
| Q3                   | 0.89 | 0.76     | 1.04     |
| Q4                   | 0.85 | 0.73     | 1.00     |
| Lariciresinol        |      |          |          |
| Q1                   | 1    |          |          |
| Q2                   | 1.05 | 0.89     | 1.22     |
| Q3                   | 1.11 | 0.94     | 1.31     |
| Q4                   | 1.17 | 0.96     | 1.42     |

160 Hazard ratios (HRs) and 95% confidence intervals (CIs) for hyperuricemia incidence  
 161 by the quartiles of the dietary total lignans, matairesinol, pinoresinol,  
 162 secoisolariciresinol, and lariciresinol, respectively, based on Cox proportional hazards  
 163 regression. Covariate adjustments: age, sex, BMI, education level, household average  
 164 income, marital status, smoking status, drinking status, tea intake, physical activity,  
 165 dietary energy intake, fruit intake, vegetable intake, fish intake, and red meat intake.  
 166 HRs: Hazard ratios; CIs: confidence intervals.

167

Table S3 MaAsLin identified gut microbes associated with hyperuricemia

| Gut microbes                        | coef   | pval    | qval    |
|-------------------------------------|--------|---------|---------|
| s__Oscillibacter_sp_57_20           | -0.013 | < 0.001 | < 0.001 |
| s__Ruminococcus_gnavus              | 0.028  | < 0.001 | < 0.001 |
| s__Eubacterium_siraeum              | -0.019 | < 0.001 | < 0.001 |
| s__Odoribacter_splanchnicus         | -0.007 | < 0.001 | < 0.001 |
| s__Oscillibacter_sp_CAG_241         | -0.006 | < 0.001 | < 0.001 |
| s__Firmicutes_bacterium_CAG_83      | -0.012 | < 0.001 | < 0.001 |
| s__Butyricimonas_virosa             | -0.005 | < 0.001 | < 0.001 |
| s__Alistipes_shahii                 | -0.009 | < 0.001 | < 0.001 |
| s__Ruminococcus_bicirculans         | -0.010 | < 0.001 | 0.001   |
| s__Catabacter_hongkongensis         | -0.002 | < 0.001 | 0.003   |
| s__Roseburia_hominis                | -0.014 | < 0.001 | 0.003   |
| s__Christensenella_minuta           | -0.002 | < 0.001 | 0.003   |
| s__Alistipes_indistinctus           | -0.006 | < 0.001 | 0.003   |
| s__Faecalibacterium_prausnitzii     | -0.021 | < 0.001 | 0.003   |
| s__Firmicutes_bacterium_CAG_110     | -0.005 | < 0.001 | 0.003   |
| s__Prevotella_copri                 | -0.038 | 0.001   | 0.010   |
| s__Alistipes_finegoldii             | -0.010 | 0.001   | 0.010   |
| s__Anaerotruncus_colihominis        | -0.003 | 0.001   | 0.011   |
| s__Escherichia_coli                 | 0.043  | 0.001   | 0.011   |
| s__Alistipes_putredinis             | -0.023 | 0.002   | 0.012   |
| s__Firmicutes_bacterium_CAG_95      | -0.002 | 0.002   | 0.012   |
| s__Megamonas_hypermegale            | 0.006  | 0.002   | 0.013   |
| s__Actinomyces_sp_ICM47             | 0.002  | 0.002   | 0.014   |
| s__Fusicatenibacter_saccharivorans  | -0.011 | 0.002   | 0.014   |
| s__Butyricimonas_synergistica       | -0.001 | 0.003   | 0.020   |
| s__Intestinimonas_butyriciproducens | -0.003 | 0.003   | 0.020   |
| s__Lawsonibacter_asaccharolyticus   | -0.002 | 0.003   | 0.020   |
| s__Desulfovibrio_piger              | -0.006 | 0.003   | 0.020   |
| s__Clostridium_clostridioforme      | 0.004  | 0.004   | 0.022   |
| s__Bifidobacterium_adolescentis     | -0.014 | 0.005   | 0.024   |
| s__Barnesiella_intestinihominis     | -0.006 | 0.005   | 0.024   |
| s__Blautia_hansenii                 | 0.004  | 0.005   | 0.024   |
| s__Clostridium_bolteae              | 0.005  | 0.005   | 0.024   |
| s__Clostridium_sp_CAG_299           | 0.005  | 0.006   | 0.030   |
| s__Fusobacterium_mortiferum         | 0.003  | 0.008   | 0.038   |
| s__Eubacterium_eligens              | -0.009 | 0.008   | 0.038   |
| s__Parabacteroides_goldsteinii      | -0.002 | 0.012   | 0.053   |
| s__Ruminococcus_callidus            | -0.001 | 0.013   | 0.055   |
| s__Collinsella_stercoris            | 0.003  | 0.013   | 0.056   |
| s__Bacteroides_cellulosilyticus     | -0.004 | 0.013   | 0.056   |
| s__Anaeromassilibacillus_sp_An250   | -0.001 | 0.015   | 0.059   |
| s__Phascolarctobacterium_sp_CAG_266 | -0.004 | 0.015   | 0.059   |

| Gut microbes                        | coef   | pval  | qval  |
|-------------------------------------|--------|-------|-------|
| s__Clostridium_lavalense            | 0.001  | 0.018 | 0.066 |
| s__Oxalobacter_formigenes           | -0.002 | 0.018 | 0.066 |
| s__Gemmiger_formicilis              | -0.005 | 0.020 | 0.075 |
| s__Blautia_obeum                    | -0.004 | 0.023 | 0.082 |
| s__Blautia_sp_CAG_257               | 0.004  | 0.023 | 0.082 |
| s__Bacteroides_fragilis             | 0.010  | 0.024 | 0.082 |
| s__Actinomyces_sp_oral_taxon_181    | 0.001  | 0.026 | 0.089 |
| s__Ruthenibacterium_lactatiformans  | -0.006 | 0.029 | 0.095 |
| s__Ruminococcus_lactaris            | -0.004 | 0.030 | 0.098 |
| s__Veillonella_parvula              | 0.005  | 0.031 | 0.098 |
| s__Bacteroides_finegoldii           | -0.003 | 0.034 | 0.106 |
| s__Citrobacter_youngae              | -0.002 | 0.037 | 0.113 |
| s__Bacteroides_caccae               | -0.006 | 0.038 | 0.114 |
| s__Bacteroides_uniformis            | -0.017 | 0.041 | 0.117 |
| s__Parabacteroides_merdae           | -0.006 | 0.040 | 0.117 |
| s__Gemella_sanguinis                | 0.001  | 0.041 | 0.117 |
| s__Eisenbergiella_tayi              | -0.001 | 0.043 | 0.121 |
| s__Clostridium_leptum               | -0.002 | 0.048 | 0.133 |
| s__Holdemania_filiformis            | -0.002 | 0.049 | 0.133 |
| s__Clostridium_bolteae_CAG_59       | 0.001  | 0.051 | 0.135 |
| s__Streptococcus_gordonii           | 0.001  | 0.054 | 0.141 |
| s__Clostridium_aldenense            | 0.001  | 0.057 | 0.148 |
| s__Asaccharobacter_celatus          | -0.001 | 0.059 | 0.149 |
| s__Coproccoccus_catus               | -0.002 | 0.060 | 0.149 |
| s__Megamonas_funiformis             | 0.006  | 0.063 | 0.156 |
| s__Bacteroides_sp_OM05_12           | -0.002 | 0.064 | 0.156 |
| s__Ruminococcus_bromii              | 0.013  | 0.066 | 0.156 |
| s__Veillonella_atypica              | 0.002  | 0.066 | 0.156 |
| s__Klebsiella_quasipneumoniae       | 0.005  | 0.067 | 0.156 |
| s__Bacteroides_intestinalis         | -0.004 | 0.069 | 0.156 |
| s__Veillonella_sp_T11011_6          | 0.001  | 0.069 | 0.156 |
| s__Streptococcus_mitis              | 0.002  | 0.070 | 0.156 |
| s__Adlercreutzia_equolifaciens      | -0.002 | 0.079 | 0.173 |
| s__Collinsella_intestinalis         | 0.004  | 0.080 | 0.174 |
| s__Veillonella_dispar               | 0.001  | 0.082 | 0.176 |
| s__Eubacterium_rectale              | -0.011 | 0.088 | 0.186 |
| s__Clostridium_sp_CAG_242           | -0.002 | 0.093 | 0.195 |
| s__Erysipelatoclostridium_ramosum   | 0.004  | 0.097 | 0.199 |
| s__Parasutterella_excrementihominis | -0.003 | 0.100 | 0.203 |
| s__Intestinibacter_bartlettii       | 0.001  | 0.114 | 0.229 |
| s__Bacteroides_coprocola            | -0.005 | 0.120 | 0.239 |
| s__Akkermansia_muciniphila          | -0.007 | 0.122 | 0.240 |
| s__Coproccoccus_eutactus            | -0.004 | 0.128 | 0.248 |

| Gut microbes                       | coef   | pval  | qval  |
|------------------------------------|--------|-------|-------|
| s_Klebsiella_pneumoniae            | 0.010  | 0.147 | 0.282 |
| s_Bacteroides_coprophilus          | -0.002 | 0.157 | 0.290 |
| s_Bacteroides_stercoris            | -0.009 | 0.153 | 0.290 |
| s_Parabacteroides_distasonis       | 0.005  | 0.156 | 0.290 |
| s_Bacteroides_clarus               | 0.002  | 0.164 | 0.296 |
| s_Tyzzarella_nexilis               | 0.002  | 0.162 | 0.296 |
| s_Coprococcus_comes                | -0.004 | 0.170 | 0.301 |
| s_Klebsiella_variicola             | 0.005  | 0.169 | 0.301 |
| s_Streptococcus_salivarius         | -0.005 | 0.180 | 0.317 |
| s_Eggerthella_lenta                | 0.003  | 0.192 | 0.326 |
| s_Bacteroides_dorei                | -0.008 | 0.191 | 0.326 |
| s_Streptococcus_cristatus          | 0.001  | 0.189 | 0.326 |
| s_Roseburia_faecis                 | -0.006 | 0.205 | 0.345 |
| s_Bacteroides_massiliensis         | -0.003 | 0.225 | 0.362 |
| s_Streptococcus_sanguinis          | 0.001  | 0.220 | 0.362 |
| s_Streptococcus_thermophilus       | -0.002 | 0.218 | 0.362 |
| s_Dorea_formicigenerans            | -0.003 | 0.226 | 0.362 |
| s_Veillonella_infantium            | 0.001  | 0.226 | 0.362 |
| s_Bacteroides_ovatus               | -0.005 | 0.237 | 0.376 |
| s_Eubacterium_sp_CAG_274           | 0.002  | 0.244 | 0.383 |
| s_Gordonibacter_pamelaeae          | -0.001 | 0.263 | 0.410 |
| s_Hungatella_hathewayi             | 0.001  | 0.275 | 0.424 |
| s_Roseburia_inulinivorans          | 0.005  | 0.279 | 0.426 |
| s_Bifidobacterium_longum           | 0.006  | 0.290 | 0.437 |
| s_Clostridium_innocuum             | 0.001  | 0.291 | 0.437 |
| s_Eubacterium_sp_CAG_251           | -0.003 | 0.302 | 0.444 |
| s_Anaerostipes_hadrus              | -0.004 | 0.300 | 0.444 |
| s_Proteobacteria_bacterium_CAG_139 | -0.001 | 0.326 | 0.476 |
| s_Eubacterium_ventriosum           | -0.001 | 0.329 | 0.477 |
| s_Lachnospira_pectinoschiza        | 0.002  | 0.338 | 0.481 |
| s_Roseburia_intestinalis           | 0.003  | 0.337 | 0.481 |
| s_Bifidobacterium_dentium          | 0.001  | 0.372 | 0.511 |
| s_Enorma_massiliensis              | -0.001 | 0.371 | 0.511 |
| s_Paraprevotella_xylaniphila       | -0.001 | 0.365 | 0.511 |
| s_Eubacterium_sp_CAG_38            | 0.003  | 0.370 | 0.511 |
| s_Olsenella_scatoligenes           | -0.002 | 0.386 | 0.526 |
| s_Agathobaculum_butyriciproducens  | 0.002  | 0.391 | 0.529 |
| s_Cloacibacillus_porcorum          | 0.000  | 0.395 | 0.530 |
| s_Collinsella_aerofaciens          | -0.005 | 0.402 | 0.535 |
| s_Streptococcus_oralis             | 0.001  | 0.417 | 0.550 |
| s_Holdemanella_biformis            | -0.001 | 0.420 | 0.550 |
| s_Bacteroides_thetaiotaomicron     | -0.003 | 0.425 | 0.552 |
| s_Clostridium_sp_CAG_58            | -0.001 | 0.429 | 0.552 |

| Gut microbes                         | coef   | pval  | qval  |
|--------------------------------------|--------|-------|-------|
| s__Sutterella_parvirubra             | -0.001 | 0.435 | 0.557 |
| s__Allisonella_histaminiformans      | 0.000  | 0.448 | 0.568 |
| s__Bacteroides_plebeius              | 0.006  | 0.464 | 0.581 |
| s__Streptococcus_vestibularis        | 0.000  | 0.464 | 0.581 |
| s__Haemophilus_parainfluenzae        | 0.001  | 0.477 | 0.591 |
| s__Bifidobacterium_bifidum           | -0.002 | 0.483 | 0.592 |
| s__Clostridium_citroniae             | 0.001  | 0.484 | 0.592 |
| s__Actinomyces_sp_S6_Spd3            | 0.000  | 0.555 | 0.673 |
| s__Streptococcus_australis           | 0.000  | 0.573 | 0.677 |
| s__Streptococcus_parasanguinis       | 0.001  | 0.575 | 0.677 |
| s__Flavonifractor_plautii            | -0.002 | 0.574 | 0.677 |
| s__Phascolarctobacterium_faecium     | -0.002 | 0.571 | 0.677 |
| s__Clostridium_symbiosum             | 0.001  | 0.587 | 0.686 |
| s__Clostridium_saccharolyticum       | 0.000  | 0.626 | 0.727 |
| s__Rothia_mucilaginosa               | -0.001 | 0.635 | 0.733 |
| s__Dialister_sp_CAG_357              | -0.003 | 0.648 | 0.742 |
| s__Eisenbergiella_massiliensis       | 0.000  | 0.654 | 0.744 |
| s__Bifidobacterium_pseudocatenulatum | 0.003  | 0.669 | 0.756 |
| s__Sellimonas_intestinalis           | 0.000  | 0.674 | 0.757 |
| s__Megasphaera_elsdenii              | 0.001  | 0.686 | 0.765 |
| s__Eubacterium_ramulus               | -0.001 | 0.704 | 0.780 |
| s__Blautia_wexlerae                  | -0.001 | 0.721 | 0.794 |
| s__Bilophila_wadsworthia             | 0.000  | 0.727 | 0.794 |
| s__Streptococcus_anginosus_group     | 0.000  | 0.750 | 0.811 |
| s__Eubacterium_limosum               | 0.000  | 0.752 | 0.811 |
| s__Actinomyces_odontolyticus         | 0.000  | 0.810 | 0.868 |
| s__Bacteroides_salyersiae            | 0.000  | 0.856 | 0.906 |
| s__Bacteroides_xylanisolvans         | -0.001 | 0.853 | 0.906 |
| s__Dorea_longicatena                 | 0.000  | 0.876 | 0.921 |
| s__Bacteroides_eggerthii             | 0.000  | 0.909 | 0.948 |
| s__Clostridium_asparagiforme         | 0.000  | 0.913 | 0.948 |
| s__Ruminococcus_torques              | 0.000  | 0.921 | 0.950 |
| s__Bacteroides_vulgatus              | -0.001 | 0.950 | 0.963 |
| s__Streptococcus_infantis            | 0.000  | 0.947 | 0.963 |
| s__Eubacterium_sp_CAG_180            | 0.000  | 0.952 | 0.963 |
| s__Eubacterium_hallii                | 0.000  | 0.991 | 0.994 |
| s__Enterobacter_cloacae_complex      | 0.000  | 0.994 | 0.994 |

169 MaAsLin identified gut microbes associated with hyperuricemia. Threshold was set as

170  $q < 0.25$ .

171

172

Table S4 The association of microbe risk score with hyperuricemia

|                    | ORs   | Lower CI | Upper CI |
|--------------------|-------|----------|----------|
| Microbe risk score |       |          |          |
| Q1                 | 1     |          |          |
| Q2                 | 1.295 | 0.974    | 1.721    |
| Q3                 | 1.448 | 1.091    | 1.922    |
| Q4                 | 2.623 | 1.976    | 3.482    |

173 Odds ratios (ORs) and 95% confidence intervals (CIs) for hyperuricemia by the  
 174 quartiles of the microbe risk score, based on Cox proportional hazards regression.  
 175 Covariate adjustments: age, sex, BMI, education level, household average income,  
 176 marital status, smoking status, drinking status, tea intake, physical activity, dietary  
 177 energy intake, fruit intake, vegetable intake, fish intake, and red meat intake. ORs: Odds  
 178 ratios; CIs: confidence intervals.

179



Table S5 The association of dietary lignans intake with gut microbes

|                                  | beta  | 2.5%  | 97.5% | p value |
|----------------------------------|-------|-------|-------|---------|
| <b>Total lignans</b>             |       |       |       |         |
| s__Fusobacterium_mortiferum      | -0.08 | -0.13 | -0.03 | 0.001   |
| s__Blautia_sp_CAG_257            | -0.07 | -0.11 | -0.02 | 0.004   |
| s__Erysipelatoclostridium_amosum | -0.07 | -0.11 | -0.02 | 0.006   |
| s__Blautia_hansenii              | -0.05 | -0.09 | 0.00  | 0.045   |
| s__Ruminococcus_gnavus           | -0.04 | -0.09 | 0.00  | 0.077   |
| s__Escherichia_coli              | -0.04 | -0.08 | 0.01  | 0.135   |
| s__Akkermansia_muciniphila       | 0.02  | -0.03 | 0.07  | 0.375   |
| s__Alistipes_finegoldii          | 0.05  | 0.00  | 0.09  | 0.049   |
| s__Barnesiella_intestinihominis  | 0.05  | 0.00  | 0.09  | 0.046   |
| s__Eubacterium_siraeum           | 0.05  | 0.00  | 0.10  | 0.033   |
| Microbe risk score               | -0.09 | -0.14 | -0.05 | < 0.001 |
| <b>Matairesinol</b>              |       |       |       |         |
| s__Fusobacterium_mortiferum      | -0.08 | -0.13 | -0.03 | 0.001   |
| s__Blautia_sp_CAG_257            | -0.05 | -0.10 | -0.01 | 0.024   |
| s__Erysipelatoclostridium_amosum | -0.06 | -0.10 | -0.01 | 0.017   |
| s__Blautia_hansenii              | -0.04 | -0.09 | 0.00  | 0.067   |
| s__Ruminococcus_gnavus           | -0.05 | -0.10 | -0.01 | 0.027   |
| s__Escherichia_coli              | -0.05 | -0.10 | -0.01 | 0.029   |
| s__Akkermansia_muciniphila       | 0.01  | -0.04 | 0.06  | 0.696   |
| s__Alistipes_finegoldii          | 0.03  | -0.02 | 0.07  | 0.287   |
| s__Barnesiella_intestinihominis  | 0.03  | -0.01 | 0.08  | 0.141   |
| s__Eubacterium_siraeum           | 0.04  | -0.01 | 0.09  | 0.090   |
| Microbe risk score               | -0.08 | -0.13 | -0.04 | < 0.001 |
| <b>Pinoresinol</b>               |       |       |       |         |
| s__Fusobacterium_mortiferum      | -0.08 | -0.12 | -0.03 | 0.001   |
| s__Blautia_sp_CAG_257            | -0.06 | -0.10 | -0.01 | 0.015   |
| s__Erysipelatoclostridium_amosum | -0.06 | -0.10 | -0.01 | 0.018   |
| s__Blautia_hansenii              | -0.04 | -0.08 | 0.01  | 0.117   |
| s__Ruminococcus_gnavus           | -0.04 | -0.09 | 0.00  | 0.063   |
| s__Escherichia_coli              | -0.04 | -0.09 | 0.01  | 0.097   |
| s__Akkermansia_muciniphila       | 0.02  | -0.03 | 0.06  | 0.493   |
| s__Alistipes_finegoldii          | 0.04  | -0.01 | 0.08  | 0.131   |
| s__Barnesiella_intestinihominis  | 0.04  | 0.00  | 0.09  | 0.078   |
| s__Eubacterium_siraeum           | 0.05  | 0.00  | 0.09  | 0.041   |
| Microbe risk score               | -0.08 | -0.13 | -0.04 | < 0.001 |
| <b>Secoisolariciresinol</b>      |       |       |       |         |
| s__Fusobacterium_mortiferum      | -0.06 | -0.11 | -0.02 | 0.007   |
| s__Blautia_sp_CAG_257            | -0.07 | -0.12 | -0.02 | 0.003   |
| s__Erysipelatoclostridium_amosum | -0.04 | -0.09 | 0.00  | 0.067   |
| s__Blautia_hansenii              | -0.03 | -0.08 | 0.02  | 0.209   |
| s__Ruminococcus_gnavus           | -0.02 | -0.06 | 0.03  | 0.466   |

|                                 | beta  | 2.5%  | 97.5% | p value |
|---------------------------------|-------|-------|-------|---------|
| s__Escherichia_coli             | 0.01  | -0.04 | 0.05  | 0.802   |
| s__Akkermansia_muciniphila      | 0.06  | 0.01  | 0.10  | 0.019   |
| s__Alistipes_finegoldii         | 0.03  | -0.02 | 0.08  | 0.204   |
| s__Barnesiella_intestinihominis | 0.05  | 0.00  | 0.10  | 0.032   |
| s__Eubacterium_siraeum          | 0.04  | -0.01 | 0.09  | 0.096   |
| Microbe risk score              | -0.07 | -0.12 | -0.03 | 0.002   |

181 Beta coefficients of gut microbes for each SD of dietary total lignans, matairesinol,  
182 pinoreesinol, and secoisolariciresinol.

183

Table S6 OPLS-DA identified fecal metabolites associated with hyperuricemia

| Fecal metabolites                | VIP  | coef   | p value |
|----------------------------------|------|--------|---------|
| L_Lysine                         | 0.35 | -0.001 | 0.574   |
| L_Histidine                      | 1.00 | -0.001 | 0.935   |
| L_Arginine                       | 0.45 | -0.001 | 0.918   |
| Ornithine                        | 0.36 | -0.004 | 0.217   |
| L_Glutamine                      | 0.77 | -0.002 | 0.578   |
| L_Glutamic.acid                  | 1.49 | -0.006 | 0.023   |
| L_Cystine                        | 0.80 | -0.002 | 0.786   |
| Anserine                         | 0.20 | 0.000  | 0.941   |
| Carnosine                        | 0.50 | 0.005  | < 0.001 |
| Sarcosine                        | 0.60 | -0.006 | 0.013   |
| Beta_Alanine                     | 0.70 | 0.005  | 0.011   |
| L_Alanine                        | 0.49 | -0.001 | 0.770   |
| Dimethylglycine                  | 1.18 | -0.004 | 0.142   |
| Gamma_Aminobutyric.acid          | 0.53 | 0.004  | 0.147   |
| L_Serine                         | 0.33 | -0.004 | 0.279   |
| L_threonine                      | 0.21 | -0.002 | 0.523   |
| Creatine                         | 1.03 | 0.006  | 0.032   |
| Threonic.acid                    | 0.07 | -0.001 | 0.464   |
| Hydroxypropionic.acid            | 0.63 | -0.001 | 0.609   |
| Glycylproline                    | 0.75 | -0.002 | 0.765   |
| L_Homocitrulline                 | 0.10 | -0.004 | 0.067   |
| Adenosine.monophosphate          | 0.72 | -0.004 | 0.044   |
| L_Lactic.acid                    | 0.18 | 0.001  | 0.384   |
| Nicotinic.acid                   | 1.41 | -0.005 | 0.119   |
| Methylcysteine                   | 0.20 | 0.001  | 0.905   |
| X2_Phenylglycine                 | 0.20 | 0.000  | 0.946   |
| Gallic.acid                      | 1.11 | 0.007  | 0.008   |
| L_Tyrosine                       | 0.73 | -0.002 | 0.566   |
| X3.4_Dihydroxyhydrocinnamic.acid | 0.82 | 0.009  | < 0.001 |
| L_Asparagine                     | 0.65 | 0.001  | 0.550   |
| Protocatechuic.acid              | 1.02 | 0.002  | 0.088   |
| Hydroxyphenyllactic.acid         | 0.62 | 0.004  | 0.082   |
| L_Aspartic.acid                  | 0.03 | -0.005 | 0.028   |
| Glucaric.acid                    | 0.34 | 0.001  | 0.924   |
| But_2_enoic.acid                 | 0.70 | -0.005 | 0.027   |
| Pyrrole_2_carboxylic.acid        | 0.60 | -0.003 | 0.222   |
| X2_Hydroxy_3_methylbutyric.acid  | 0.96 | 0.009  | 0.002   |
| Picolinic.acid                   | 0.60 | -0.002 | 0.354   |
| X4_Hydroxybenzoic.acid           | 0.65 | 0.004  | 0.075   |
| Ortho_Hydroxyphenylacetic.acid   | 0.25 | 0.002  | 0.756   |
| Hippuric.acid                    | 0.18 | 0.001  | 0.976   |
| L_Malic.acid                     | 0.67 | -0.001 | 0.934   |

| Fecal metabolites                        | VIP  | coef   | p value |
|------------------------------------------|------|--------|---------|
| N_Acetyl_L_aspartic.acid                 | 0.86 | -0.003 | 0.306   |
| Indole_3_methyl.acetate                  | 0.30 | -0.001 | 0.110   |
| Ethylmethylacetic.acid                   | 1.19 | -0.009 | 0.001   |
| X2_Methyl_4_pentenoic.acid               | 0.68 | -0.001 | 0.718   |
| Benzoic.acid                             | 0.54 | -0.004 | 0.034   |
| Phenylacetic.acid                        | 0.94 | -0.009 | 0.001   |
| Coumaric.acid.and.4_Hydroxycinnamic.acid | 1.22 | 0.008  | 0.005   |
| Indoleacetic.acid                        | 0.72 | -0.005 | 0.031   |
| Fumaric.acid                             | 0.28 | 0.000  | 0.919   |
| Glutaric.acid                            | 1.37 | -0.007 | 0.013   |
| trans_Aconitic.acid                      | 0.13 | 0.001  | 0.574   |
| X2_Pherylpropionate                      | 1.65 | -0.010 | < 0.001 |
| Hydrocinnamic.acid                       | 1.71 | -0.011 | < 0.001 |
| X3_Indolepropionic.acid                  | 0.92 | -0.006 | 0.009   |
| X4_Hydroxyphenylpyruvic.acid             | 0.18 | -0.002 | 0.279   |
| Azelaic.acid                             | 2.04 | -0.014 | < 0.001 |
| Sebacic.acid                             | 1.82 | -0.016 | < 0.001 |
| Alpha_ketoisovaleric.acid                | 0.09 | -0.006 | 0.049   |
| Ketoleucine                              | 0.09 | -0.005 | 0.068   |
| X3_Methyl_2_oxovaleric.acid              | 0.02 | -0.005 | 0.042   |
| Phenylpyruvic.acid                       | 0.21 | -0.004 | 0.158   |
| Methylmalonic.acid                       | 0.45 | 0.001  | 0.792   |
| D_2_Hydroxyglutaric.acid                 | 0.61 | -0.002 | 0.146   |
| Glycine                                  | 0.63 | -0.003 | 0.270   |
| Guanidoacetic.acid                       | 0.48 | 0.004  | 0.089   |
| Citrulline                               | 0.26 | -0.006 | 0.059   |
| D_Gluconolactone                         | 0.23 | 0.001  | 0.167   |
| Glycolic.acid                            | 0.96 | 0.002  | 0.140   |
| L_Alpha_aminobutyric.acid                | 0.57 | 0.004  | 0.060   |
| Glyceric.acid                            | 0.05 | 0.003  | 0.191   |
| L_Proline                                | 0.42 | -0.005 | 0.075   |
| Acetylglycine                            | 0.46 | 0.005  | 0.041   |
| L_Pipecolic.acid                         | 0.37 | 0.000  | 0.410   |
| Erythronic.acid                          | 0.17 | 0.004  | 0.217   |
| N_Acetylserine                           | 0.13 | 0.004  | 0.160   |
| Shikimic.acid                            | 0.39 | 0.005  | 0.018   |
| N_Acetylglutamine                        | 0.24 | 0.004  | 0.098   |
| N_Acetylneuraminic.acid                  | 0.01 | 0.003  | 0.207   |
| L_Valine                                 | 0.50 | -0.001 | 0.417   |
| Pyroglutamic.acid                        | 1.43 | -0.005 | 0.034   |
| X5_Aminolevulinic.acid                   | 0.31 | 0.003  | 0.139   |
| D_Glucose                                | 0.78 | 0.005  | 0.034   |
| D_Maltose.and.Alpha_Lactose              | 0.67 | 0.006  | 0.043   |

| Fecal metabolites                          | VIP  | coef   | p value |
|--------------------------------------------|------|--------|---------|
| X3_Hydroxybutyric.acid                     | 0.43 | 0.004  | 0.068   |
| L_Methionine                               | 0.45 | -0.003 | 0.373   |
| alpha_Hydroxyisobutyric.acid               | 0.51 | -0.003 | 0.500   |
| X2_Hydroxybutyric.acid                     | 0.59 | 0.006  | 0.020   |
| X3_Hydroxyisovaleric.acid                  | 0.51 | 0.000  | 0.580   |
| Glutaconic.acid                            | 0.74 | -0.002 | 0.195   |
| L_Isoleucine                               | 0.50 | -0.005 | 0.225   |
| L_Leucine                                  | 0.60 | -0.004 | 0.111   |
| D_Xylose                                   | 0.11 | -0.001 | 0.987   |
| D_Xylulose                                 | 0.12 | 0.001  | 0.723   |
| Rhamnose                                   | 1.14 | 0.005  | 0.073   |
| D_Fructose                                 | 0.21 | -0.001 | 0.548   |
| N_Acetyl_D_glucosamine                     | 0.58 | 0.005  | 0.041   |
| Propanoic.acid                             | 0.11 | 0.003  | 0.221   |
| Homovanillic.acid                          | 0.74 | 0.008  | < 0.001 |
| X3_3_Hydroxyphenyl_3_hydroxypropanoic.acid | 0.83 | 0.009  | < 0.001 |
| p_Hydroxyphenylacetic.acid                 | 0.27 | 0.002  | 0.339   |
| X3_Aminosalicylic.acid                     | 0.27 | 0.002  | 0.421   |
| L_Tryptophan                               | 1.07 | -0.002 | 0.749   |
| Butyric.acid                               | 0.84 | 0.000  | 0.955   |
| Isobutyric.acid                            | 1.30 | -0.008 | 0.004   |
| Mandelic.acid                              | 0.18 | -0.002 | 0.972   |
| Malonic.acid                               | 0.31 | 0.006  | 0.015   |
| Alpha_N_Phenylacetyl_L_glutamine           | 0.09 | 0.000  | 0.932   |
| Tartaric.acid                              | 0.31 | 0.000  | 0.803   |
| Isovaleric.acid                            | 1.16 | -0.009 | 0.001   |
| Valeric.acid                               | 1.51 | -0.008 | 0.003   |
| N_Methylnicotinamide                       | 1.02 | -0.009 | 0.001   |
| Phenyllactic.acid                          | 0.00 | 0.002  | 0.444   |
| Maleic.acid                                | 0.21 | -0.003 | 0.242   |
| Citraconic.acid                            | 0.35 | -0.002 | 0.743   |
| Methylsuccinic.acid                        | 1.73 | -0.006 | 0.030   |
| Adipic.acid                                | 2.14 | -0.014 | < 0.001 |
| Methylglutaric.acid                        | 1.60 | -0.009 | 0.001   |
| Phthalic.acid                              | 1.71 | -0.009 | < 0.001 |
| cis_Aconitic.acid                          | 0.43 | 0.000  | 0.756   |
| Pimelic.acid                               | 1.57 | -0.011 | < 0.001 |
| X3_Methyladipic.acid                       | 2.11 | -0.012 | < 0.001 |
| Isocaproic.acid                            | 1.27 | -0.007 | 0.017   |
| Caproic.acid                               | 1.71 | -0.010 | < 0.001 |
| Tauroursodeoxycholic.acid                  | 1.31 | 0.005  | 0.004   |
| Taurocholic.acid                           | 0.98 | 0.007  | 0.002   |
| Citric.acid                                | 0.50 | -0.005 | 0.137   |

| Fecal metabolites                       | VIP  | coef   | p value |
|-----------------------------------------|------|--------|---------|
| Isocitric.acid                          | 0.29 | 0.000  | 0.797   |
| Heptanoic.acid                          | 1.65 | -0.011 | < 0.001 |
| Pyruvic.acid                            | 0.31 | -0.001 | 0.797   |
| Taurodeoxycholic.acid                   | 0.02 | -0.001 | 0.707   |
| Taurochenodeoxycholic.acid              | 1.20 | 0.007  | 0.014   |
| X7_DHCA                                 | 1.97 | 0.011  | < 0.001 |
| X3_DHCA                                 | 1.16 | 0.008  | 0.004   |
| a_muricholic.acid.and.b_muricholic.acid | 1.91 | 0.011  | < 0.001 |
| Oxoglutaric.acid                        | 0.80 | -0.005 | 0.032   |
| Glycoursodeoxycholic.acid               | 1.79 | 0.008  | 0.001   |
| Octanoic.acid                           | 0.88 | -0.006 | 0.003   |
| Taurolithocholic.acid                   | 0.19 | 0.002  | 0.252   |
| muro_cholic.acid                        | 1.98 | 0.010  | < 0.001 |
| bHyodeoxycholic.acid                    | 2.23 | 0.013  | < 0.001 |
| Ursodeoxycholic.acid                    | 1.39 | -0.011 | < 0.001 |
| Hyodeoxycholic.acid                     | 0.86 | -0.005 | 0.610   |
| Hyochoolic.acid                         | 1.33 | 0.003  | 0.426   |
| Cholic.acid                             | 1.97 | 0.012  | < 0.001 |
| Glycocholic.acid                        | 1.51 | 0.009  | < 0.001 |
| Decanoic.acid                           | 0.67 | -0.004 | 0.017   |
| isolithocholic.acid                     | 0.97 | -0.006 | 0.031   |
| Glycochenodeoxycholic.acid              | 1.62 | 0.012  | < 0.001 |
| Glycodeoxycholic.acid                   | 0.26 | 0.000  | 0.673   |
| Tridecanoic.acid                        | 0.49 | -0.008 | 0.005   |
| Ricinoleic.acid                         | 0.29 | -0.001 | 0.280   |
| Lithocholic.acid                        | 0.96 | -0.007 | 0.061   |
| Glycolithocholic.acid                   | 0.43 | -0.003 | 0.221   |
| Myristic.acid                           | 0.03 | -0.002 | 0.397   |
| X9_Pentadecenoic.acid                   | 0.68 | 0.003  | 0.589   |
| Pentadecanoic.acid                      | 0.19 | -0.004 | 0.095   |
| Palmitoleic.acid                        | 1.30 | 0.004  | 0.125   |
| X10_Trans_Heptadecenoic.acid            | 0.27 | 0.002  | 0.352   |
| Alpha_Linolenic.acid                    | 0.43 | 0.001  | 0.639   |
| Linoleic.acid                           | 0.04 | -0.001 | 0.461   |
| Eicosapentaenoic.acid..EPA              | 1.26 | 0.005  | 0.030   |
| Arachidonic.acid                        | 1.72 | 0.008  | 0.005   |
| X8.11.14_Eicosatrienoic.acid            | 2.22 | 0.012  | < 0.001 |
| Docosahexaenoic.acid.DHA                | 1.55 | 0.006  | 0.001   |
| Docosapentaenoic.acid.DPA               | 2.30 | 0.012  | < 0.001 |
| Docosapentaenoic.acid.22n_6             | 1.58 | 0.011  | < 0.001 |
| Adrenic.acid                            | 2.19 | 0.010  | < 0.001 |
| Succinic.acid                           | 0.50 | 0.002  | 0.702   |
| Citramalic.acid                         | 0.49 | 0.007  | 0.014   |

| Fecal metabolites           | VIP  | coef   | p value |
|-----------------------------|------|--------|---------|
| Oleic.acid                  | 0.11 | -0.002 | 0.284   |
| Petroselinic.acid           | 0.13 | 0.003  | 0.082   |
| Nonadeca_10Z_enoic.acid     | 0.88 | 0.001  | 0.446   |
| Carnitine                   | 1.08 | 0.005  | 0.018   |
| Malonylcarnitine            | 0.64 | 0.005  | 0.011   |
| Palmitoylcarnitine          | 2.33 | 0.015  | < 0.001 |
| Oleylcarnitine.C18.1        | 2.14 | 0.013  | < 0.001 |
| Linoleylcarnitine           | 1.53 | 0.008  | < 0.001 |
| Stearyl carnitine           | 2.01 | 0.011  | < 0.001 |
| Methionine.sulfoxide        | 0.00 | -0.005 | 0.148   |
| Methylmalonylcarnitine.C4DC | 0.75 | 0.001  | 0.882   |
| NorCA                       | 1.21 | 0.008  | 0.003   |
| NorDCA                      | 0.83 | -0.008 | 0.001   |
| X2.2_dimethyladipic.acid    | 0.63 | -0.002 | 0.086   |
| X7ketoLCA                   | 2.01 | 0.011  | < 0.001 |
| Chenodeoxycholic.acid       | 1.72 | 0.011  | < 0.001 |
| L_Phenylalanine             | 0.91 | -0.001 | 0.607   |
| N_acetyltryptophan          | 0.13 | -0.001 | 0.819   |
| Benzamide                   | 0.29 | -0.003 | 0.374   |
| Oxalic.acid                 | 0.60 | -0.004 | 0.303   |
| Fructose.1.6_bisphosphate   | 0.31 | -0.005 | 0.015   |
| Suberic.acid                | 2.19 | -0.016 | < 0.001 |
| Nonanoic.acid               | 0.79 | -0.008 | 0.004   |
| Trehalose                   | 0.80 | -0.005 | 0.035   |
| Palmitic.acid               | 0.11 | -0.004 | 0.089   |
| Stearic.acid                | 0.57 | -0.004 | 0.124   |
| Acetic.acid                 | 0.61 | 0.002  | 0.583   |

185 OPLS-DA identified fecal metabolites associated with hyperuricemia. Threshold was  
186 set as VIP > 1 and P < 0.05.

187

188

189

Table S7 The association of bile acid risk score with hyperuricemia

|                      | ORs   | Lower CI | Upper CI |
|----------------------|-------|----------|----------|
| Bile acid risk score |       |          |          |
| Q1                   | 1     |          |          |
| Q2                   | 1.229 | 0.839    | 1.802    |
| Q3                   | 1.36  | 0.928    | 1.992    |
| Q4                   | 2.19  | 1.499    | 3.198    |

190 Odds ratios (ORs) and 95% confidence intervals (CIs) for hyperuricemia by the  
 191 quartiles of the bile acid risk score, based on logistic regression. Covariate adjustments:  
 192 age, sex, BMI, education level, household average income, marital status, smoking  
 193 status, drinking status, tea intake, physical activity, dietary energy intake, fruit intake,  
 194 vegetable intake, fish intake, and red meat intake. ORs: Odds ratios; CIs: confidence  
 195 intervals.

196



Table S8 The association of dietary lignans intake with bile acids

|                             | beta  | 2.5%  | 97.5% | p value |
|-----------------------------|-------|-------|-------|---------|
| <b>Total lignans</b>        |       |       |       |         |
| NorCA                       | -0.08 | -0.14 | -0.01 | 0.016   |
| Taurochenodeoxycholic acid  | -0.07 | -0.14 | -0.01 | 0.021   |
| Glycoursodeoxycholic acid   | -0.06 | -0.13 | 0.00  | 0.045   |
| Glycochenodeoxycholic acid  | -0.06 | -0.12 | 0.00  | 0.060   |
| Bile acid risk score        | -0.09 | -0.15 | -0.03 | 0.004   |
| <b>Matairesinol</b>         |       |       |       |         |
| NorCA                       | -0.07 | -0.13 | -0.01 | 0.027   |
| Taurochenodeoxycholic acid  | -0.08 | -0.14 | -0.02 | 0.010   |
| Glycoursodeoxycholic acid   | -0.07 | -0.13 | -0.01 | 0.030   |
| Glycochenodeoxycholic acid  | -0.06 | -0.12 | 0.00  | 0.070   |
| Bile acid risk score        | -0.09 | -0.15 | -0.03 | 0.004   |
| <b>Pinoresinol</b>          |       |       |       |         |
| NorCA                       | -0.06 | -0.13 | 0.00  | 0.046   |
| Taurochenodeoxycholic acid  | -0.09 | -0.15 | -0.02 | 0.006   |
| Glycoursodeoxycholic acid   | -0.07 | -0.13 | -0.01 | 0.024   |
| Glycochenodeoxycholic acid  | -0.07 | -0.13 | -0.01 | 0.034   |
| Bile acid risk score        | -0.10 | -0.16 | -0.03 | 0.003   |
| <b>Secoisolariciresinol</b> |       |       |       |         |
| NorCA                       | -0.05 | -0.12 | 0.01  | 0.096   |
| Taurochenodeoxycholic acid  | 0.01  | -0.06 | 0.07  | 0.868   |
| Glycoursodeoxycholic acid   | -0.02 | -0.08 | 0.04  | 0.483   |
| Glycochenodeoxycholic acid  | -0.02 | -0.09 | 0.04  | 0.470   |
| Bile acid risk score        | -0.03 | -0.09 | 0.03  | 0.335   |

198 Beta coefficients of fecal bile acid for each SD of dietary total lignans, matairesinol,

199 pinoresinol, and secoisolariciresinol.
